# Supplementary material
Source: PubMed Central journal article supplement (PMC4437771)
Supplement: NIHMS688868-supplement-supplemental_files.pdf [file NIHMS688868-supplement-supplemental_files.pdf]

*Electronic Supplementary Information (ESI) for Lab on a Chip*

## **ElectroTaxis-on-a-Chip (ETC): an Integrated Quantitative High-throughput Screening Platform for Electrical Field-Directed Cell Migration**

Siwei Zhao,<sup>‡<sup>a</sup></sup> Kan Zhu,<sup>‡<sup>b</sup></sup> Yan Zhang,<sup>c</sup> Zijie Zhu,<sup>a</sup> Zhengping Xu,<sup>c</sup> Min Zhao,<sup>\*<sup>b</sup></sup> and Tingrui Pan<sup>\*<sup>a</sup></sup>

<sup>a</sup> *Micro-Nano Innovations (MiNI) Laboratory, Department of Biomedical Engineering, University of California, Davis, CA, USA; E-mail: [tingrui@ucdavis.edu](mailto:tingrui@ucdavis.edu)*

<sup>b</sup> *Department of Dermatology, University of California, Davis, CA, USA; E-mail: [minzhao@ucdavis.edu](mailto:minzhao@ucdavis.edu)*

<sup>c</sup> *Department of Environmental Medicine, School of Medicine, Zhejiang University, Zhejiang Province, P. R. China*

*\* Corresponding authors: [minzhao@ucdavis.edu](mailto:minzhao@ucdavis.edu) and [tingrui@ucdavis.edu](mailto:tingrui@ucdavis.edu)*

*‡ These authors contributed equally to this paper.*

**Video Captions:**

**Video S1** Cell migration under 2.1 mV/mm electrical field (EF) stimulation. The EF vector is from left to right

**Video S2** Cell migration under 4.1 mV/mm EF stimulation. The EF vector is from left to right

**Video S3** Cell migration under 8.1 mV/mm EF stimulation. The EF vector is from left to right

**Video S4** Cell migration under 14.9 mV/mm EF stimulation. The EF vector is from left to right

**Video S5** Cell migration under 27.6 mV/mm EF stimulation. The EF vector is from left to right

**Video S6** Cell migration under 52.8 mV/mm EF stimulation. The EF vector is from left to right

**Video S7** Cell migration under 101.2 mV/mm EF stimulation. The EF vector is from left to right

**Video S8** Cell migration under 195.6 mV/mm EF stimulation. The EF vector is from left to right

**Video S9** Cell migration under 380 mV/mm EF stimulation. The EF vector is from left to right

**Video S10** Cell migration under 778 mV/mm EF stimulation. The EF vector is from left to right

**Video S11** Cell migration under 1614.4 mV/mm EF stimulation. The EF vector is from left to right
